# Supplementary material for: Pre-IVF treatment with a GnRH antagonist in women with endometriosis (PREGNANT): study protocol for a prospective, double-blind, placebo-controlled trial
Source: PubMed Central journal article supplement — BMJ Open. 2022 Jun 16;12(6):e052043. doi: 10.1136/bmjopen-2021-052043 (PMC9207753; doi:10.1136/bmjopen-2021-052043), 2022-06-16
Supplement: bmjopen-2021-052043supp001.pdf [file bmjopen-2021-052043supp001.pdf]

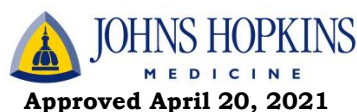

Lead Study Investigator: Dr. Hugh Taylor  
Master Informed Consent Approval Date: April 20, 2021  
Site Specific Consent Information Approval Date: April 20, 2021  
JHM IRB Application No.: IRB00236742

## RESEARCH PARTICIPANT INFORMED CONSENT AND PRIVACY AUTHORIZATION FORM

### Master Informed Consent Form

**Protocol Title:** Pre-IVF treatment with a GnRH antagonist in women with endometriosis – A prospective double-blind placebo-controlled trial (PREGnant)

**Application No.:** IRB00236742

**Sponsor By:** National Institutes of The Eunice Kennedy Shriver Institute of Child Health and Human Development (NICHD)

**Principal Investigator:** Dr. Hugh Taylor  
Yale School of Medicine  
310 Cedar Street FMB 3<sup>rd</sup> Fl Rm #302  
New Haven CT, 06510  
Tel. 203-785-4001  
Email: [hugh.taylor@yale.edu](mailto:hugh.taylor@yale.edu)

---

You are being asked to take part in a research study. Participation in this study is voluntary. Even if you decide to join now, you can change your mind later.

This is a multi-site study, meaning it will take place at several different locations. Because this is a multi-site study this informed consent form includes two parts. The first part of this document includes information that applies to all study sites. The second part of the consent form includes information specific to the study site where you are being asked to enroll.

#### 1. Research Summary (Key Information):

The information in this section is intended to be an introduction to the study only. Complete details of the study are listed in the sections below. If you are considering participation in the study, the entire document should be discussed with you before you make your final decision. You can ask questions about the study now and at any time in the future.

We are asking you to be in this research because you have been diagnosed with endometriosis and are seeking to undergo in vitro fertilization with an embryo transfer (IVF-ET). This research is being done to find out if pre-treatment with an GnRH antagonist, elagolix, also known as ORILISSA™, will increase the chance of having a baby with IVF-ET.

Long term complete female hormone suppression with an injectable drug has been shown to improve pregnancy rates in women with endometriosis undergoing IVF. Elagolix treatment is an oral

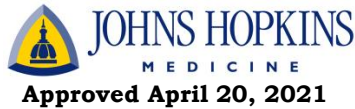

Lead Study Investigator: Dr. Hugh Taylor  
Master Informed Consent Approval Date: April 20, 2021  
Site Specific Consent Information Approval Date: April 20, 2021  
JHM IRB Application No.: IRB00236742

mechanism to lower hormones, however the repression is not as drastic as seen with the injectable drug. Elagolix is shown to treat endometriosis is a more gentle way without the severe side effects seen with the complete suppression. Here, we will determine if elagolix similarly improves pregnancy rates in women with endometriosis undergoing IVF.

In this study, we will provide you with study medication, either elagolix 200 mg twice a day or a placebo (which is like a sugar pill) twice a day, for 60 days prior to the start of your IVF cycle. You may receive the elagolix or placebo up to 14 additional days for the convenience of your IVF cycle scheduling. You will then undergo IVF-ET as planned with your reproductive endocrinologist. We will collect information about your IVF cycle and your embryo transfer.

If you did not get pregnant after the first IVF cycle, we will provide you with a second course of study drug for another 60 days prior to a second fresh IVF cycle or a frozen embryo transfer (FET), depending upon the availability of embryos. We will collect information about your IVF cycle, but after 2 embryo transfers there will be no more courses of study drug.

If you did not have an embryo transfer after the first IVF cycle and chose to freeze embryos, we will provide you with a second course of study drug for another 60 days of treatment prior to a frozen embryo transfer (FET).

If you did not become pregnant after the first frozen embryo transfer, you will have a third 60 days course of study drug prior to your second frozen embryo transfer. Up to three 60 days courses of treatment with study drug are allowed if you do not become pregnant and your first cycle was a “freeze all” cycle. In this case of frozen embryo transfer, will collect information about your IVF cycle, but after 2 embryo transfers there will be no more courses of study drug.

If you have an embryo transfer immediately following your IVF cycle, a “fresh” cycle, and become pregnant, there will be a total of 5 study visits. If you have a frozen transfer, do not get pregnant and have a subsequent frozen transfer, you could have as many as 11 study visits. Study visits include questionnaires, physical exam, pregnancy testing, and blood sample collection. There are risks associated with taking elagolix that are described later in this document.

## 2. Why is this research being done?

This research is being done to see if women who have been diagnosed with endometriosis who are planning on undergoing in vitro fertilization-embryo transfer (IVF-ET) who are pre-treated with a minimum of 60 days of elagolix have improved live birth rates compared to those who receive a minimum of 60 days of placebo.

### Are there any investigational drugs/devices/procedures?

ORLISSA™ (elagolix) which has Food and Drug Administration (FDA) for treating pain related to endometriosis. It is not approved for use as part of the IVF-ET regimen. The FDA is allowing the use of elagolix in this research study.

### Who can join this study?

Women between the ages of  $\geq 18$ - $\leq 38$  years with ultrasound, pathology or surgical diagnosis of endometriosis who plan to undergo IVF-ET for infertility management may join the trial.

### How many people will be in this study?

About 814 women with endometriosis will be in this study across four main sites (Yale University,

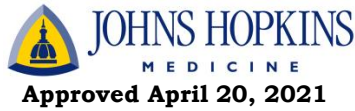

Lead Study Investigator: Dr. Hugh Taylor  
Master Informed Consent Approval Date: April 20, 2021  
Site Specific Consent Information Approval Date: April 20, 2021  
JHM IRB Application No.: IRB00236742

University of Colorado, University of North Carolina, Northwestern University) and a satellite enrolling site (Johns Hopkins University). Ancillary sites may be added if needed. All sites are within the United States.

### 3. What will happen if you join this study?

If you agree to be in this study, we will ask you to do the following things:

#### Screening Visit

This visit can take place on the same day that you and your regular doctor decide that you will undergo IVF-ET. After you review and sign the consent form, your study doctor will make sure you qualify for this study. This visit will take about 2 hours.

- This consent form will be reviewed by you and with the study staff. You will have an opportunity to read this consent form in full and ask any questions you may have about the procedures involved, risks and time commitments related to this study. Once all of your questions have been answered, and if you are willing to participate, you will be asked to sign this consent form. A copy will be provided to you for your records and a copy will be uploaded into your Electronic Medical Record.
- Your past medical and menstrual history will be recorded. This form will ask a series of questions about your medical health, family health history, reproductive and gynecological history, pregnancy history, and current use of medications.
- Your height, weight, vital signs (blood pressure and pulse) and hip and abdominal circumference will be collected. Your BMI (body mass index) will be calculated.
- Your demographic information will be recorded, such as age, race and ethnicity.
- A physical exam will be performed by the physician if one was not done in the last 90 days.
- You will be given two questionnaires to complete, one concerns your infertility, the other asks about your endometriosis symptoms.
- You will receive counseling on double barrier methods of contraception.
- A transvaginal ultrasound which involves inserting an ultrasound probe into your vagina to visualize your ovaries and uterus. Measurements and ultrasound pictures will be recorded of your ovaries and uterus.

The following procedures done for IVF treatment and would be performed as part of your IVF work up even if you were not a participant in the study:

- Uterine cavity assessment by either hysteroscopy or sonohysterogram.
- A pap smear if you are 21 or older and have not had one within the time period specified by current guidelines.
- Urine or cervical swabs for gonorrhea and chlamydia.
- Collect blood for Safety Laboratory tests (Comprehensive Metabolic Panel, CMP) for your physician to review if not in your medical record. This blood work will consist of checking hormone levels and that you are not anemic (a condition where your blood lacks healthy red blood cells).

#### Randomization Visit – Visit 1

After the Screening Visit, if you are eligible to continue in the research, you will return to the study Center to begin study regimen. You will be randomized by a computer system to receive either elagolix or placebo. A placebo is a pill that looks just like the elagolix pill but does not contain any active study

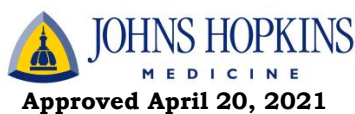

Lead Study Investigator: Dr. Hugh Taylor  
Master Informed Consent Approval Date: April 20, 2021  
Site Specific Consent Information Approval Date: April 20, 2021  
JHM IRB Application No.: IRB00236742

drug. Randomization means whichever study regimen you receive it will be determined purely by chance, like a flip of a coin. You will have an equal chance to receive either elagolix or placebo. Neither you nor your physician will be able to decide to which group you are assigned. Neither you nor your study team will know which study drug (elagolix or placebo) you will receive but this information can be made available in case of an emergency. Half of study participants are expected to receive placebo.

In addition to dispensing 30 days of study drug and giving instructions on how to take it, the study doctor or study staff will do the following:

- You will have about 2 teaspoons of blood drawn. The purpose of the blood collection is to store the serum in our biorepository so that we can look at biomarkers in your blood in hopes that we can determine which women with endometriosis will benefit from GnRH antagonist pre-treatment.
- A urine pregnancy test will be performed.
- You will be asked about any medication changes you may have made since the Screening Visit.

### **Study Visit 2**

You will return 30 days after your Study Visit 1 (with window up to 37 days) where the following will occur:

- A qualified member of the research team will collect and count any remaining study drug.
- An additional 30 days of study drug will be dispensed.
- You will be asked about any adverse events or any medication changes

### **Study Visit 3**

You will return about 30 days after Study Visit 2, and up to 74 days post-Visit 1, depending on the timing of your IVF cycle start.

- A qualified member of the research team will collect and count any remaining study drug.
- You will be asked about any adverse events or any medication changes.
- You will be given two questionnaires to complete, one concerns your infertility, the other asks about your endometriosis symptoms.
- Blood will be collected. About 2 teaspoons of blood will be drawn for safety labs (CMP) and remaining serum will be stored as in Visit 1.
- A urine pregnancy test will be performed.
- A transvaginal ultrasound which involves inserting an ultrasound probe into your vagina to visualize your ovaries and uterus. Measurements and ultrasound pictures will be recorded of your ovaries and uterus.

### **IVF Cycle**

You will then undergo your IVF cycle which is standard of care and not a part of the study. We will record information about your IVF cycle and if you are having the embryos transferred within a week of retrieval, (a Fresh Embryo Transfer cycle), we will record the information about your embryo transfer. If you become pregnant, we will record information about your pregnancy.

### **Study Visit 4**

This visit as well as Study Visits 5 and 6, will only occur when you are eligible for an Embryo Transfer (ET) under one of the following circumstances:

- If you had a Fresh Embryo Transfer and did not become pregnant or had a pregnancy loss prior to 10 weeks, and have frozen embryos banked and are returning for a Frozen Embryo Transfer.

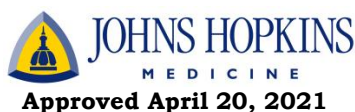

Lead Study Investigator: Dr. Hugh Taylor  
Master Informed Consent Approval Date: April 20, 2021  
Site Specific Consent Information Approval Date: April 20, 2021  
JHM IRB Application No.: IRB00236742

- If you had a Fresh Embryo Transfer and did not become pregnant or had a pregnancy loss prior to 10 weeks, and do not have any frozen embryos and are returning for a second Fresh IVF cycle.
- If you are having a Frozen Embryo Transfer, this visit will occur 2 months prior to the transfer.
- If you had a Frozen Embryo Transfer and did not become pregnant or had a pregnancy loss prior to 10 weeks and are returning for a second Frozen Embryo Transfer.

This visit provides you with another 60 days of study drug prior to your planned FET or second IVF-ET start. You will come in about 60 days prior to when the FET or IVF will start. In addition to dispensing 30 days of study drug and giving instructions on how to take it, the study doctor or study staff will do the following:

- You will be dispensed 30 days of study drug. This will be the same study drug that you were given when you were randomized.
- A urine pregnancy test will be performed.
- A transvaginal ultrasound will be performed.
- Blood will be collected. About 2 teaspoons of blood will be drawn for safety labs (CMP) and remaining serum will be stored as in Visit 1.
- You will be asked about any medication changes you may have made since your last study visit.

#### **Study Visit 5**

You will return 30 days after your Study Visit 4 where the following will occur:

- A qualified member of the research team will collect and count any remaining study drug.
- An additional 30 days of study drug will be dispensed.
- You will be asked about any adverse events or any medication changes since your last study visit.

#### **Study Visit 6**

You will return about 30 days after Study Visit 5, up to 74 days post-Visit 4, depending on the timing of your transfer or IVF cycle start.

- A qualified member of the research team will collect and count any remaining study drug.
- You will be asked about any adverse events or any medication changes since your last visit.
- Blood will be collected. About 2 teaspoons of blood will be drawn for safety labs (CMP) and remaining serum which will be stored as in Visit 1.
- A urine pregnancy test will be performed.
- A transvaginal ultrasound will be performed.

#### **End of Study (EOS) Visit**

This visit will occur when either you have:

- An ongoing pregnancy at the time of discharge to Obstetrics.
- A negative pregnancy test following a second embryo transfer.
- A spontaneous pregnancy loss prior to 10 weeks gestation following a second embryo transfer.
- If 6 months pass from completion of the first cycle without beginning Visit 4 OR if 6 months pass from the completion of the first frozen transfer without starting the repeat of Visit 4.

This visit will include the following:

- A qualified member of the research team will ask you about any medication changes since your last study visit.
- You will be given two questionnaires to complete, one about your infertility and the other about your endometriosis symptoms.



Lead Study Investigator: Dr. Hugh Taylor  
Master Informed Consent Approval Date: April 20, 2021  
Site Specific Consent Information Approval Date: April 20, 2021  
JHM IRB Application No.: IRB00236742

### **Pregnancy Follow-up**

We will follow up the outcome of your pregnancy. If you become pregnant after enrolled in the study, we will collect information related to your pregnancy outcomes including data on your newborn from your physician and delivery records from your labor and delivery hospital.

While you are in the study, you agree to:

- follow the instructions you are given,
- come to the study clinic for all visits with the study doctor or a member of the research team,
- tell the study doctor or a member of the research team about any changes in your health or the way you feel,
- or tell the study doctor or a member of the research team if you want to stop being in the study at any time.

### **Incidental Findings**

As part of this research study, you will undergo imaging procedures. A qualified professional will review your research imaging. This research imaging will not include the full diagnostic information that you would get if your primary doctor referred you for imaging.

There is a possibility that while reviewing your imaging we may see an unexpected abnormality. This is called an “incidental finding.”

We will let you know if we see such an incidental finding. Depending on the type of incidental finding, we may contact you by mail, email, or phone. In the case of a potential serious emergency, someone may go to your home.

A qualified person (usually a member of the research team) will talk to you if there is an incidental finding. You do not have an option to decline information about an incidental finding from an imaging procedure.

If you want, we will give information about this incidental finding to your primary doctor or we will refer you to an appropriate doctor for further evaluation.

What could happen if there is an incidental finding?

- An incidental finding may cause you to feel anxious.
- Since a report of the incidental finding will be part of your medical record, it will be available to those accessing your medical record for your clinical care and may affect your current or future life or health insurance coverage. This risk will vary depending on the type of insurance plan involved.

The costs for any care that may come from the incidental finding, such as the need to see a doctor to diagnose or treat an incidental finding, will not be paid for by this research study. These costs would be your or your insurance company’s responsibility.

### **How long will you be in the study?**

If you decide to be in this study and the study doctor says you are eligible for the study, your participation will be 15 months if you do not become pregnant and undergo two embryo transfers. Your participation will be up to 24 months if you undergo two embryo transfers and become pregnant with the second transfer.





Lead Study Investigator: Dr. Hugh Taylor  
Master Informed Consent Approval Date: April 20, 2021  
Site Specific Consent Information Approval Date: April 20, 2021  
JHM IRB Application No.: IRB00236742

#### **4. What happens to data and biospecimens that are collected in the study?**

If you join this study, your data and biospecimens will be used to answer the research question and your data will be used to publish the findings of this study. Biospecimens may include any of the following: blood, tissue, saliva, urine, bone marrow, cells, etc. Most biospecimens contain DNA, which is the genetic code for each person.

You will not own the data and/or biospecimens collected from you as part of this research study. If researchers use them to create a new product or idea, including those that may have commercial value, you will not benefit financially from those efforts.

Johns Hopkins researchers and their collaborators may use the data/biospecimens collected in this study for future research purposes and may share some of the data/biospecimens with others.

Because science constantly advances, we do not yet know what future use of research data or biospecimens may include. This future research may be unrelated to the current study and may include outside collaborators.

Sharing data and/or biospecimens is part of research and may increase what we can learn from this study. Often, data/biospecimen sharing is required as a condition of funding or for publishing study results. It also is needed to allow other researchers to validate study findings and to come up with new ideas. Your data and/or biospecimens may be shared with researchers at Johns Hopkins and other institutions, for-profit companies, sponsors, government agencies, and other research partners. Your data and/or biospecimens may also be put in government or other databases/repositories.

We (Johns Hopkins) will do our best to protect and maintain your data/biospecimens in a safe way. One of the ways we protect data/biospecimens is by limiting the uses of the information and the type of information that is shared, especially your personal information. This may occur through data/specimen sharing agreements and review by oversight groups within Johns Hopkins.

If data/biospecimens are used or shared with types of information that may be likely to identify you, such as your name, address or medical record number, further institutional review and approval would be required. In these cases, Johns Hopkins will review whether additional consent from you is required. Generally, if your data/biospecimens are used/shared without any personal identifiers or with information that is less likely to identify you (such as the date of a procedure), further review and approval is not needed.

Data/biospecimen sharing could change over time, and may continue after the study ends.

The use and sharing of your data and biospecimens is required for participation in this research study. If you are not comfortable with the use and sharing of your data/biospecimens in future research without further consent, you should not participate in this study.

#### **5. What are the risks or discomforts of the study?**

If you decide to participate in this study, you will not change your regular medical care, which includes your IVF cycle or embryo transfer.



Lead Study Investigator: Dr. Hugh Taylor  
Master Informed Consent Approval Date: April 20, 2021  
Site Specific Consent Information Approval Date: April 20, 2021  
JHM IRB Application No.: IRB00236742

Ask any member of the research team if you have questions about the signs or symptoms of any side effects that you read about in this consent form. Please tell the study doctor or a member of the research team right away if you have any side effects. Please tell them if you have any other problems with your health or the way you feel during the study, whether you think these problems are related to the study or not.

### **Risks of taking ORILISSA™ (elagolix)**

The very common side effects of elagolix observed in women include:

- hot flashes (21.1% or about 21 in 100)
- headache (16.2% or about 16 in 100)
- feeling sick to one's stomach (nausea)(11.8% or about 12 in 100)

#### *Mood Change:*

During the endometriosis and uterine fibroids clinical trials, some subjects experienced mood changes, including mood swing, depression, depressed mood and anxiety during elagolix administration. In the endometriosis elagolix studies, depression was reported in 1.9% (about 2 in 100) subjects and depressed mood was reported in 0.8% (about 1 in 100) subjects. A number of subjects who reported depression had a history of depression. In the endometriosis program, four cases of suicidal thought, and one case with a history of depression reported suicidal thoughts while on elagolix. One case of depression with suicidal thought was reported while on placebo. There was one case of completed suicide which was considered by the study doctor not related to study drug but rather related to potential life stress. There was one case of suicidal ideation in the uterine fibroids program in a woman who received placebo.

If you have history of depression, other psychiatric related conditions or taking an anti-depressant, please let your study doctor know. If you have any of the above symptoms, please contact your study doctor immediately.

#### *Effects on Menstrual Bleeding:*

While you are taking elagolix you may experience changes in your menstrual cycle and bleeding pattern. Your menstrual bleeding may be more or less, or occur for fewer days or no days. The time between each period may also be shorter or longer and your periods may not be predictable. At higher doses, elagolix may completely suppress your periods. This effect is reversible after stopping elagolix.

#### *Bone Mineral Density and the Risk of Fractures:*

Similar to other medications that reduce female hormone levels in the body, particularly estrogen levels, elagolix has been shown to reduce bone mineral density and affect laboratory values that measure bone health and strength. The data suggest that higher doses and longer exposure to elagolix result in greater bone loss. Bone loss can place a woman at risk for osteoporosis (softening of the bones) and fractures (broken bones). Inform the study doctor if you or family members have been diagnosed with osteoporosis, if your mother had a hip fracture, if you are a smoker, if you have used or are now using drugs such as corticosteroids or drugs to treat epilepsy (convulsions or seizures), and if you have ever had any fractures.

Because the risk of fractures depends on many factors (including your age, overall health status, overall bone strength), you should discuss the possible risk of fractures specific to you with your study doctor. There is evidence that the bone loss associated with the use of elagolix is reversible.





Lead Study Investigator: Dr. Hugh Taylor  
Master Informed Consent Approval Date: April 20, 2021  
Site Specific Consent Information Approval Date: April 20, 2021  
JHM IRB Application No.: IRB00236742

#### *Effects on Liver:*

Increased levels of some liver function tests have been reported in subjects receiving elagolix. These increases were temporary, were generally not accompanied by any symptoms and were usually noted within the first 3 months of elagolix. The liver function tests improved in all subjects whether they continued to take elagolix or not. Your liver function tests will be routinely monitored during this study.

#### *Drug Interaction Risks:*

It is very important that you tell the study doctor about any other medicines (either prescription or over the counter) or supplements such as vitamins or herbs that you are taking.

#### *Unknown risk*

There may be side effects and discomforts that are not yet known.

#### **Risks of giving blood for this study**

The study doctor or study staff will take your blood by sticking a needle in your arm. Some problems you might have from this are:

- pain at the site of the needle placement
- bruising at the site of the needle placement
- dizziness
- infection

You should get medical help and contact the study doctor or study staff if you have any of these or any other side effects during the study.

#### **Transvaginal Ultrasound**

This type of ultrasound uses a probe that is inserted in the vagina. You may feel discomfort from the probe.

#### **Other potential risks of being in this study**

Filling out the questionnaire about your pelvic pain, menstrual cycle, and history of pregnancy and infertility could lead you to feel uncomfortable or upset. Please tell the study doctor or study staff if you feel uncomfortable or upset while filling out the questionnaire. You have the right to refuse to answer any questions.

There is a risk that information about you may become known to people outside of this study. You will read more about the protection of your information later in this form under the heading “How will your privacy be protected?” Please ask the study doctor or study staff if you would like to know more about how your information will be protected while you are in this study.

#### **6. Are there risks related to pregnancy?**

There are no known risks.

#### **7. Are there benefits to being in the study?**

There may or may not be a direct benefit to you from this research. The results of this research may guide the future of treatment for women with endometriosis undergoing in vitro fertilization.



Lead Study Investigator: Dr. Hugh Taylor  
Master Informed Consent Approval Date: April 20, 2021  
Site Specific Consent Information Approval Date: April 20, 2021  
JHM IRB Application No.: IRB00236742

## 8. What are your options if you do not want to be in the study?

You do not have to participate in this study to receive treatment for your endometriosis-related infertility. Choosing not to participate will not have any effect on your clinical care.

You do not have to join this study. If you do not join, your care at any of the study clinics (Northwestern University, University of Colorado, Yale University, University of North Carolina, and Johns Hopkins University) will not be affected.

## 9. Will you be paid if you join this study?

No, you will not receive any payment or compensation if you join this study

## 10. Can you leave the study early?

- You can agree to be in the study now and change your mind later.
- If you wish to stop, please tell us right away.
- Leaving this study early will not stop you from getting regular medical care.

If you drop out of the study early, the study team (at Northwestern University, University of Colorado, Yale University, University of North Carolina, or Johns Hopkins University) may use your health information that it has already collected if the information is needed for this study or any follow-up activities.

## 11. Will the study require any of your other health care providers to share your health information with the researchers of this study?

As a part of this study, the researchers may ask to see your health care records from your other healthcare providers.

## 12. What is a Certificate of Confidentiality?

Your study information is protected by a Certificate of Confidentiality. This Certificate allows us, in some cases, to refuse to give out your information even if requested using legal means.

It does not protect information that we have to report by law, such as child abuse or some infectious diseases. The Certificate does not prevent us from disclosing your information if we learn of possible harm to yourself or others, or if you need medical help.

Disclosures that you consent to in this document are not protected. This includes putting research data in the medical record or sharing research data for this study or future research. Disclosures that you make yourself are also not protected.

## 13. What other things should you know about this research study?

During the study, we will tell you if we learn any new information that might affect whether you wish to continue to participate.

A description of this clinical trial will be available on <http://www.ClinicalTrials.gov>, as required by U.S. Law. This Web site will not include information that can identify you. At most, the Web site will include a summary of the results. You can search this Web site at any time. If you would like to review the information for this study, or a summary of the results, ask the study team doctor for the



Lead Study Investigator: Dr. Hugh Taylor  
Master Informed Consent Approval Date: April 20, 2021  
Site Specific Consent Information Approval Date: April 20, 2021  
JHM IRB Application No.: IRB00236742

ClinicalTrials.gov study registration number.

**What is the Institutional Review Board (IRB) and how does it protect you?**

This study has been reviewed by an Institutional Review Board (IRB), a group of people that reviews human research studies. The IRB can help you if you have questions about your rights as a research participant or if you have other questions, concerns or complaints about this research study. You may contact the IRB at 410-502-2092 or [jhmeirb@jhmi.edu](mailto:jhmeirb@jhmi.edu).

**What should you do if you have questions about the study, or are injured or ill as a result of being in this study?**

Call the principal investigator for your study site, which is listed in the “Site-specific Consent Information” (Part 2 of this consent). If you wish, you may contact the principal investigator by letter. If you cannot reach the principal investigator or wish to talk to someone else, call the IRB office at 410-502-2092.

If you have an urgent medical problem or think you are injured or ill because of this study, call 911 or go to your local emergency department. You should also call the study site physician at the number listed in the “Site-specific Consent Information” (Part 2 of this consent).

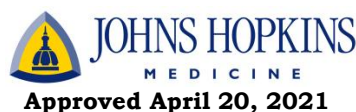

Lead Study Investigator: Dr. Hugh Taylor  
Master Informed Consent Approval Date: April 20, 2021  
Site Specific Consent Information Approval Date: April 20, 2021  
JHM IRB Application No.: IRB00236742

## **SITE SPECIFIC CONSENT INFORMATION**

**Site Name:** Johns Hopkins Hospital

**Study Title:** Pre-IVF treatment with a GnRH antagonist in women with endometriosis – A prospective double-blind placebo-controlled trial (PREGnant)

**JHM IRB Application Number:** IRB00236742

**Site Principal Investigator:** Dr. James Segars

**Site Principal Investigator Contact Information:**

**Dr. James Segars**  
**Professor and Director**  
**Division of Reproductive Sciences & Women's Health Research**  
**Department of Gynecology and Obstetrics**  
**Johns Hopkins School of Medicine**  
**720 Rutland Avenue, Ross Research Building Room 624**  
**Baltimore, MD, 21205**  
**Phone: 410-614-2000 Fax: 410-614-7060**

**Emergency Contact:** Mobile: 301-512-1556

---

### **Introduction:**

This study is being done at multiple sites. This part of the consent form includes information about your site and is specific to participation at your site only. Before making your decision, both the site-specific information and general study information will be reviewed with you. You will have the opportunity to discuss any questions, including questions about this portion of the consent document, with your site's study team.

### **Will it cost you anything to be in this study?**

You will receive a separate Insurance and Research Participant Financial Responsibility Information Sheet (Sheet).

This Sheet will give you the following information:

- The procedures, tests, drugs or devices that are part of this research and that will be paid for by the study (no cost to you).
- The procedures, tests, drugs or devices that will be billed to you and/or your health insurer. If you have health insurance, you will be responsible for any co-pays or deductibles not covered by your insurance.



Lead Study Investigator: Dr. Hugh Taylor  
Master Informed Consent Approval Date: April 20, 2021  
Site Specific Consent Information Approval Date: April 20, 2021  
JHM IRB Application No.: IRB00236742

### **Compensation for Research-Related Injury:**

Johns Hopkins and the federal government do not have programs to pay you if you are hurt or have other bad results from being in the study. However, medical care at Johns Hopkins is open to you as it is to all sick or injured people.

The costs for any treatment or hospital care you receive as the result of a study-related injury that are not covered by a health insurer will be billed to you.

By signing this form, you will not give up any rights you have to seek compensation for injury.

### **Site IRB Contact Information:**

A description of this clinical trial will be available on <http://www.ClinicalTrials.gov>, as required by U.S. Law. This Web site will not include information that can identify you. At most, the Web site will include a summary of the results. You can search this Web site at any time. If you would like to review the information for this study, or a summary of the results, ask the study team doctor for the ClinicalTrials.gov study registration number.

During the study, we will tell you if we learn any new information that might affect whether you wish to continue to participate.

### **What should you do if you have questions about the study, or are injured or ill as a result of being in this study?**

Call the principal investigator, Dr. James Segars at 410-614-2000. If you wish, you may contact the principal investigator by letter. The address is on page one of this consent form. If you cannot reach the principal investigator or wish to talk to someone else, call the IRB office at 410-502-2092.

If you have an urgent medical problem or think you are injured or ill because of this study, call 911 or go to your local emergency department. You should also call Dr. James Segars at 410-614-2000 during regular office hours and at 301-512-1556 after hours and on weekends. If this doctor is not available, the operator will page the "on call physician."

### **How will your privacy be maintained and how will the confidentiality of your data be protected?**

#### **HIPAA Authorization for Disclosure of Protected Health Information**

#### **What information is being collected, used, or shared?**

To do this research, we will need to collect, use, and share your private health information. By signing this document, you agree that your health care providers (including both Johns Hopkins Medicine and others) may release your private health information to us, and that we may use any and all of your information that the study team believes it needs to conduct the study. Your private information may include things learned from the procedures described in this consent form, as well as information from your medical record (which may include information such as HIV status, drug, alcohol or STD treatment, genetic test results, or mental health treatment).

#### **Who will see, use or share the information?**

The people who may request, receive or use your private health information include the researchers and their staff who may be a part of Johns Hopkins Health System, Johns Hopkins University or the Johns Hopkins



Lead Study Investigator: Dr. Hugh Taylor  
Master Informed Consent Approval Date: April 20, 2021  
Site Specific Consent Information Approval Date: April 20, 2021  
JHM IRB Application No.: IRB00236742

Applied Physics Laboratory. Additionally, we may share your information with other people at Johns Hopkins, for example if needed for your clinical care or study oversight. By signing this form, you give permission to the research team to share your information with others outside of Johns Hopkins. This may include the sponsor of the study and its agents or contractors, outside providers, study safety monitors, government agencies, other sites in the study, data managers and other agents and contractors used by the study team. We try to make sure that everyone who sees your information keeps it confidential, but we cannot guarantee that your information will not be shared with others. If your information is disclosed by your health care providers or the research team to others, federal and state confidentiality laws may no longer protect it.

### **Do you have to sign this Authorization?**

You do not have to sign this Authorization, but if you do not, you may not join the study.

### **How long will your information be used or shared?**

Your Authorization for the collection, use, and sharing of your information does not expire. Additionally, you agree that your information may be used for similar or related future research studies.

### **What if you change your mind?**

You may change your mind and cancel this Authorization at any time. If you cancel, you must contact the Principal Investigator in writing to let them know by using the contact information provided in this consent form. Your cancellation will not affect information already collected in the study, or information that has already been shared with others before you cancelled your authorization.

### **How will your information be protected?**

All hard copy data contained in the participants' study will be maintained in a locked office. Whenever possible you will be identified only by the Study Identification Number (SID) to maintain confidentiality. All other study records will be kept in a locked file cabinet. Your data entered into the YNHH Oncore system is a secure password protected database system which meets all the HIPAA required security. Clinical information will not be released without your written permission, except as necessary for monitoring by the IRB, the DCC, OHRP, the sponsor, or the sponsor's designee.



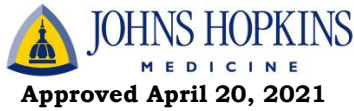

Lead Study Investigator: Dr. Hugh Taylor  
 Master Informed Consent Approval Date: April 20, 2021  
 Site Specific Consent Information Approval Date: April 20, 2021  
 JHM IRB Application No.: IRB00236742

## Optional Study Components:

### Future Contact

We would like your permission for our research team to contact you in the future. Please note that your decision below does not prevent other researchers at Johns Hopkins from contacting you about other research.

**Please sign and date your choice below:**

YES  \_\_\_\_\_  
 Signature of Participant Date

NO  \_\_\_\_\_  
 Signature of Participant Date

### Site IRB Contact Information:

#### **What should you do if you have questions about the study, or are injured or ill as a result of being in this study?**

Call the principal investigator, Dr. James Segars at 410-614-2000. If you wish, you may contact the principal investigator by letter. The address is on page one of this consent form. If you cannot reach the principal investigator or wish to talk to someone else, call the IRB office at 410-502-2092.

If you have an urgent medical problem or think you are injured or ill because of this study, call 911 or go to your local emergency department. You should also call Dr. James Segars at 410-614-2000 during regular office hours and at 301-512-1556 after hours and on weekends. If this doctor is not available, the operator will page the "on call physician."



Lead Study Investigator: Dr. Hugh Taylor  
 Master Informed Consent Approval Date: April 20, 2021  
 Site Specific Consent Information Approval Date: April 20, 2021  
 JHM IRB Application No.: IRB00236742

## Signature Lines

### What does your signature on this consent form mean?

Your signature on this form means that you have reviewed the information in this form, you have had a chance to ask questions, and you agree to join the study. You will not give up any legal rights by signing this consent form.

## WE WILL GIVE YOU A COPY OF THIS SIGNED AND DATED CONSENT FORM

---

Signature of Participant (Print Name) Date/Time

---

Signature of Person Obtaining Consent (Print Name) Date/Time

**I have received the separate Insurance and Research Participant Financial Responsibility Information Sheet.**

---

Signature of Participant (Print Name) Date/Time

---

Signature of Interpreter/Witness to Consent Procedures (Print Name) Date/Time  
 (Required for studies enrolling non-English speakers using the short form process or otherwise as determined required by the IRB)

**NOTE: A COPY OF THE SIGNED, DATED CONSENT FORM MUST BE KEPT BY THE PRINCIPAL INVESTIGATOR AND A COPY MUST BE GIVEN TO THE PARTICIPANT. IF APPROPRIATE FOR THIS STUDY, A SCANNED COPY OF THE SIGNED CONSENT FORM SHOULD BE UPLOADED TO THE PARTICIPANT'S EPIC/EMR RECORD (UNLESS NO MEDICAL RECORD EXISTS OR WILL BE CREATED).**

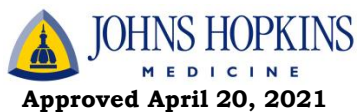

Lead Study Investigator: Dr. Hugh Taylor  
Master Informed Consent Approval Date: April 20, 2021  
Site Specific Consent Information Approval Date: April 20, 2021  
JHM IRB Application No.: IRB00236742

## DOCUMENTATION OF PHYSICIAN/MID-LEVEL PROVIDER CONSENT PROCESS

**My signature below indicates that I have discussed the risks, benefits, and alternatives, answered any questions, and believe the participant is able to make an informed choice to join the study.**

---

Signature of Physician/Mid-Level Provider (Print Name) Date/Time

---

Signature of Participant (Print Name) Date/Time

**NOTE: A COPY OF THE SIGNED, DATED CONSENT FORM MUST BE KEPT BY THE PRINCIPAL INVESTIGATOR AND A COPY MUST BE GIVEN TO THE PARTICIPANT. IF APPROPRIATE FOR THIS STUDY, A SCANNED COPY OF THE SIGNED CONSENT FORM SHOULD BE UPLOADED TO THE PARTICIPANT'S EPIC/EMR RECORD (UNLESS NO MEDICAL RECORD EXISTS OR WILL BE CREATED).**
